# Supplementary material
Source: MDPI journal article supplement (https://www.mdpi.com/2073-4433/14/12/1783)
Supplement: s1 [file s1 › atmosphere-2678327-supplementary.pdf]

*Supplementary Materials*

# Personal Exposure to Fine Particulate Air Pollution among Brick Workers in Nepal

James D. Johnston <sup>1,\*</sup>, Scott C. Collingwood <sup>2,3</sup>, James D. LeCheminant <sup>4</sup>, Neil E. Peterson <sup>5</sup>, Paul R. Reynolds <sup>6</sup>, Juan A. Arroyo <sup>6</sup>, Andrew J. South <sup>7</sup>, Clifton B. Farnsworth <sup>7</sup>, Ryan T. Chartier <sup>8</sup>, Lindsey N. Layton <sup>1</sup>, James H. Lu <sup>1</sup>, Marli S. Penrod <sup>1</sup>, Seshananda Sanjel <sup>9</sup> and John D. Beard <sup>1</sup>

<sup>1</sup> Department of Public Health, Brigham Young University, Provo, UT 84602, USA; layton18@byu.edu (L.N.L.); luhua jr@gmail.com (J.H.L.); marlishaw8@gmail.com (M.S.P.); john\_beard@byu.edu (J.D.B.)

<sup>2</sup> Department of Pediatrics, University of Utah, Salt Lake City, UT 84112, USA; scott.collingwood@hsc.utah.edu

<sup>3</sup> Rocky Mountain Center for Occupational and Environmental Health, University of Utah, Salt Lake City, UT 84112, USA

<sup>4</sup> Department of Nutrition, Dietetics, and Food Science, Brigham Young University, Provo, UT 84602, USA

<sup>5</sup> College of Nursing, Brigham Young University, Provo, UT 84602, USA; neil-peterson@byu.edu

<sup>6</sup> Department of Cell Biology and Physiology, Brigham Young University, Provo, UT 84602, USA; paul\_reynolds@byu.edu (P.R.R.); jarroyo@byu.edu (J.A.A.)

<sup>7</sup> Department of Civil and Construction Engineering, Brigham Young University, Provo, UT 84602, USA; andrew\_south@byu.edu (A.J.S.); clifton\_farnsworth@byu.edu (C.B.F.)

<sup>8</sup> RTI International, Research Triangle Park, NC 27709, USA; rchartier@rti.org

<sup>9</sup> Department of Community Medicine and Public Health, Karnali Academy of Health Sciences, Jumla 21200, Nepal; seshanandasanjel24@gmail.com

\* Correspondence: james\_johnston@byu.edu; Tel.: +1-801-422-4226

**Table S1.** Associations between job and housing characteristics and mean personal breathing zone temperature among workers<sup>a</sup> at a brick kiln in Bhaktapur, Nepal, March 2023.

| Characteristic                                                         | IQR   | Temperature, °C   |                         |                      |
|------------------------------------------------------------------------|-------|-------------------|-------------------------|----------------------|
|                                                                        |       | GM <sup>b</sup>   | 95% CI <sup>b</sup>     | p-value <sup>b</sup> |
| Job category                                                           |       |                   |                         |                      |
| Administration                                                         |       | 23.56             | 20.88, 26.59            |                      |
| Firemen                                                                |       | 25.84             | 23.27, 28.69            |                      |
| Green brick hand molder                                                |       | 23.80             | 22.10, 25.63            |                      |
| Green brick machine molder                                             |       | 22.23             | 20.33, 24.30            |                      |
| Top loader                                                             |       | 31.90             | 28.52, 35.68            | <0.001 <sup>c</sup>  |
| Internal house area, m <sup>2</sup>                                    | 5.70  | 0.94 <sup>d</sup> | 0.88, 1.01 <sup>d</sup> | 0.08                 |
| Internal house volume, m <sup>3</sup>                                  | 12.43 | 0.95 <sup>d</sup> | 0.90, 1.01 <sup>d</sup> | 0.11                 |
| How long lived in house, months                                        | 20.00 | 0.99 <sup>d</sup> | 0.97, 1.01 <sup>d</sup> | 0.46                 |
| Firemen home                                                           |       |                   |                         |                      |
| No                                                                     |       | 24.60             | 23.19, 26.10            |                      |
| Yes                                                                    |       | 25.44             | 22.49, 28.78            | 0.62                 |
| Where live during summer monsoon months when brick kilns are shut down |       |                   |                         |                      |
| Same house                                                             |       | 24.63             | 22.02, 27.55            |                      |
| Different house in the Kathmandu Valley                                |       | 23.76             | 21.24, 26.57            |                      |
| Different house outside the Kathmandu Valley                           |       | 25.25             | 23.48, 27.16            | 0.65                 |
| How many people live in house                                          |       |                   |                         |                      |
| 1-2                                                                    |       | 26.91             | 24.30, 29.79            |                      |
| 3-4                                                                    |       | 22.98             | 21.09, 25.03            |                      |
| 5-11                                                                   |       | 25.12             | 23.17, 27.23            | 0.06                 |
| How many adults live in house                                          | 2.00  | 0.97 <sup>d</sup> | 0.90, 1.05 <sup>d</sup> | 0.45                 |
| How many children under 18 years of age live in house                  |       |                   |                         |                      |
| 0                                                                      |       | 25.86             | 23.53, 28.42            |                      |
| 1-5                                                                    |       | 24.27             | 22.78, 25.87            | 0.27                 |
| How many children under six years of age live in house                 |       |                   |                         |                      |
| 0-1                                                                    |       | 24.62             | 23.28, 26.05            |                      |
| 2                                                                      |       | 25.96             | 22.01, 30.62            | 0.54                 |
| Occupant density, residents/100 m <sup>2</sup>                         | 26.34 | 1.01 <sup>d</sup> | 0.95, 1.07 <sup>d</sup> | 0.83                 |
| Heating source in the home                                             |       |                   |                         |                      |

| Characteristic                                                      | IQR  | Temperature, °C   |                         |                      |
|---------------------------------------------------------------------|------|-------------------|-------------------------|----------------------|
|                                                                     |      | GM <sup>b</sup>   | 95% CI <sup>b</sup>     | p-value <sup>b</sup> |
| No                                                                  |      | 24.99             | 23.54, 26.53            | 0.49                 |
| Yes                                                                 |      | 23.89             | 21.26, 26.84            |                      |
| How often is the heating source in the home used                    |      |                   |                         |                      |
| Never                                                               |      | 24.99             | 23.53, 26.55            | 0.79                 |
| Less than once per day                                              |      | 24.06             | 20.37, 28.43            |                      |
| Once per day or more                                                |      | 23.72             | 20.07, 28.02            |                      |
| Any smokers living in the home                                      |      |                   |                         |                      |
| No                                                                  |      | 24.94             | 23.09, 26.95            | 0.79                 |
| Yes                                                                 |      | 24.59             | 22.83, 26.48            |                      |
| How many smokers living in the home                                 | 1.00 | 0.98 <sup>d</sup> | 0.92, 1.04 <sup>d</sup> | 0.48                 |
| How many smokers living in the home regularly smoke inside the home |      |                   |                         |                      |
| 0-1                                                                 |      | 24.92             | 23.55, 26.36            | 0.48                 |
| 2-3                                                                 |      | 23.44             | 19.88, 27.65            |                      |

Abbreviations: CI, confidence interval; GM, geometric mean; GMR, geometric mean ratio; IQR, interquartile range.

<sup>a</sup> Two samples were missing because one of the 50 workers enrolled in the study declined to participate in the personal breathing zone air sampling and a MicroPEM malfunctioned for another worker, so we could not obtain personal breathing zone information for that worker.

<sup>b</sup> Estimated using simple (i.e., unadjusted) linear regression models of the natural logarithm transformed values.

<sup>c</sup> After using the Tukey-Kramer method to adjust for multiple comparisons, tests of pairwise differences among job categories had the following p-values: Administration vs. Firemen: 0.77, Administration vs. Green brick hand molder: >0.99, Administration vs. Green brick machine molder: 0.93, Administration vs. Top loader: 0.005, Firemen vs. Green brick hand molder: 0.70, Firemen vs. Green brick machine molder: 0.20, Firemen vs. Top loader: 0.06, Green brick hand molder vs. Green brick machine molder: 0.76, Green brick hand molder vs. Top loader: <0.001, Green brick machine molder vs. Top loader: <0.001.

<sup>d</sup> GMR (i.e., exponentiated regression slope coefficient) and 95% CI for an IQR increase in the job or housing characteristic; please note GMR - 1 = percent change in GM for an IQR increase in the job or housing characteristic; estimated using simple (i.e., unadjusted) linear regression models of the natural logarithm transformed values.

**Table S2.** Associations between job and housing characteristics and mean personal breathing zone relative humidity among workers<sup>a</sup> at a brick kiln in Bhaktapur, Nepal, March 2023.

| Characteristic                                                         | IQR   | Relative Humidity, % |                           |                      |
|------------------------------------------------------------------------|-------|----------------------|---------------------------|----------------------|
|                                                                        |       | AM <sup>b</sup>      | 95% CI <sup>b</sup>       | p-value <sup>b</sup> |
| Job category                                                           |       |                      |                           |                      |
| Administration                                                         |       | 45.19                | 49.42, 53.65              |                      |
| Firemen                                                                |       | 37.05                | 40.71, 44.37              |                      |
| Green brick hand molder                                                |       | 46.85                | 49.45, 52.04              |                      |
| Green brick machine molder                                             |       | 52.08                | 55.21, 58.33              |                      |
| Top loader                                                             |       | 37.31                | 41.23, 45.15              | <0.001 <sup>c</sup>  |
| Internal house area, m <sup>2</sup>                                    | 5.70  | 3.69 <sup>d</sup>    | 1.06, 6.33 <sup>d</sup>   | 0.007                |
| Internal house volume, m <sup>3</sup>                                  | 12.43 | 2.83 <sup>d</sup>    | 0.53, 5.13 <sup>d</sup>   | 0.02                 |
| How long lived in house, months                                        | 20.00 | -0.14 <sup>d</sup>   | -0.99, 0.70 <sup>d</sup>  | 0.73                 |
| Firemen home                                                           |       |                      |                           |                      |
| No                                                                     |       | 47.38                | 49.54, 51.70              |                      |
| Yes                                                                    |       | 37.39                | 41.90, 46.40              | 0.003                |
| Where live during summer monsoon months when brick kilns are shut down |       |                      |                           |                      |
| Same house                                                             |       | 44.47                | 48.87, 53.27              |                      |
| Different house in the Kathmandu Valley                                |       | 46.29                | 50.70, 55.10              |                      |
| Different house outside the Kathmandu Valley                           |       | 43.83                | 46.69, 49.55              | 0.29                 |
| How many people live in house                                          |       |                      |                           |                      |
| 1-2                                                                    |       | 43.52                | 47.55, 51.57              |                      |
| 3-4                                                                    |       | 48.14                | 51.52, 54.91              |                      |
| 5-11                                                                   |       | 42.21                | 45.41, 48.61              | 0.04 <sup>e</sup>    |
| How many adults live in house                                          | 2.00  | -1.93 <sup>d</sup>   | -4.95, 1.10 <sup>d</sup>  | 0.21                 |
| How many children under 18 years of age live in house                  |       |                      |                           |                      |
| 0                                                                      |       | 43.50                | 47.31, 51.13              |                      |
| 1-5                                                                    |       | 45.89                | 48.47, 51.04              | 0.62                 |
| How many children under six years of age live in house                 |       |                      |                           |                      |
| 0-1                                                                    |       | 46.20                | 48.44, 50.68              |                      |
| 2                                                                      |       | 38.70                | 45.27, 51.85              | 0.36                 |
| Occupant density, residents/100 m <sup>2</sup>                         | 26.34 | -2.84 <sup>d</sup>   | -5.19, -0.50 <sup>d</sup> | 0.02                 |
| Heating source in the home                                             |       |                      |                           |                      |

| Characteristic                                                      | IQR  | Relative Humidity, % |                          |                      |
|---------------------------------------------------------------------|------|----------------------|--------------------------|----------------------|
|                                                                     |      | AM <sup>b</sup>      | 95% CI <sup>b</sup>      | p-value <sup>b</sup> |
| No                                                                  |      | 45.39                | 47.79, 50.18             | 0.56                 |
| Yes                                                                 |      | 44.66                | 49.33, 54.00             |                      |
| How often is the heating source in the home used                    |      |                      |                          |                      |
| Never                                                               |      | 45.37                | 47.79, 50.21             | 0.75                 |
| Less than once per day                                              |      | 41.54                | 48.21, 54.87             |                      |
| Once per day or more                                                |      | 43.78                | 50.45, 57.12             |                      |
| Any smokers living in the home                                      |      |                      |                          |                      |
| No                                                                  |      | 46.03                | 49.10, 52.17             | 0.37                 |
| Yes                                                                 |      | 44.26                | 47.20, 50.14             |                      |
| How many smokers living in the home                                 | 1.00 | -0.46 <sup>d</sup>   | -2.83, 1.91 <sup>d</sup> | 0.70                 |
| How many smokers living in the home regularly smoke inside the home |      |                      |                          |                      |
| 0-1                                                                 |      | 45.63                | 47.89, 50.14             | 0.54                 |
| 2-3                                                                 |      | 43.40                | 50.01, 56.62             |                      |

Abbreviations: AM, arithmetic mean; CI, confidence interval; IQR, interquartile range.

<sup>a</sup> Two samples were missing because one of the 50 workers enrolled in the study declined to participate in the personal breathing zone air sampling and a MicroPEM malfunctioned for another worker, so we could not obtain personal breathing zone information for that worker.

<sup>b</sup> Estimated using simple (i.e., unadjusted) linear regression models of the original values.

<sup>c</sup> After using the Tukey-Kramer method to adjust for multiple comparisons, tests of pairwise differences among job categories had the following p-values: Administration vs. Firemen: 0.02, Administration vs. Green brick hand molder: >0.99, Administration vs. Green brick machine molder: 0.19, Administration vs. Top loader: 0.05, Firemen vs. Green brick hand molder: 0.003, Firemen vs. Green brick machine molder: <0.001, Firemen vs. Top loader: >0.99, Green brick hand molder vs. Green brick machine molder: 0.05, Green brick hand molder vs. Top loader: 0.008, Green brick machine molder vs. Top loader: <0.001.

<sup>d</sup> Change in AM (i.e., regression slope coefficient) and 95% CI for an IQR increase in the job or housing characteristic; estimated using simple (i.e., unadjusted) linear regression models of the original values.

<sup>e</sup> After using the Tukey-Kramer method to adjust for multiple comparisons, tests of pairwise differences among categories of how many people live in house had the following p-values: 1-2 vs. 3-4: 0.29, 1-2 vs. 5-11: 0.68, 3-4 vs. 5-11: 0.03.

**Table S3.** Associations between housing characteristics and mean personal breathing zone temperature adjusted for job category among workers<sup>a</sup> at a brick kiln in Bhaktapur, Nepal, March 2023.

| Housing Characteristic                                                 | Temperature<br>p-value <sup>b</sup> | Job Characteristic | Temperature<br>p-value <sup>b</sup> |
|------------------------------------------------------------------------|-------------------------------------|--------------------|-------------------------------------|
| Internal house area, m <sup>2</sup>                                    | 0.98                                | Job category       | 0.001                               |
| Internal house volume, m <sup>3</sup>                                  | 0.78                                | Job category       | 0.001                               |
| How long lived in house, months                                        | 0.86                                | Job category       | <0.001                              |
| Firemen home                                                           | 0.93                                | Job category       | <0.001                              |
| Where live during summer monsoon months when brick kilns are shut down | 0.92                                | Job category       | <0.001                              |
| How many people live in house                                          | 0.42                                | Job category       | 0.001                               |
| How many adults live in house                                          | 0.99                                | Job category       | <0.001                              |
| How many children under 18 years of age live in house                  | 0.27                                | Job category       | <0.001                              |
| How many children under six years of age live in house                 | 0.62                                | Job category       | <0.001                              |
| Occupant density, residents/100 m <sup>2</sup>                         | 0.75                                | Job category       | <0.001                              |
| Heating source in the home                                             | 0.50                                | Job category       | <0.001                              |
| How often is the heating source in the home used                       | 0.80                                | Job category       | <0.001                              |
| Any smokers living in the home                                         | 0.37                                | Job category       | <0.001                              |
| How many smokers living in the home                                    | 0.35                                | Job category       | <0.001                              |
| How many smokers living in the home regularly smoke inside the home    | 0.82                                | Job category       | <0.001                              |

<sup>a</sup> Two samples were missing because one of the 50 workers enrolled in the study declined to participate in the personal breathing zone air sampling and a MicroPEM malfunctioned for another worker, so we could not obtain personal breathing zone information for that worker.

<sup>b</sup> Estimated using multivariable linear regression models of the natural logarithm transformed values adjusted for job category and the housing characteristic.

**Table S4.** Associations between housing characteristics and mean personal breathing zone relative humidity adjusted for job category among workers<sup>a</sup> at a brick kiln in Bhaktapur, Nepal, March 2023.

| Housing Characteristic                                                 | Relative Humidity    | Job Characteristic | Relative Humidity    |
|------------------------------------------------------------------------|----------------------|--------------------|----------------------|
|                                                                        | p-value <sup>b</sup> |                    | p-value <sup>b</sup> |
| Internal house area, m <sup>2</sup>                                    | 0.54                 | Job category       | <0.001               |
| Internal house volume, m <sup>3</sup>                                  | 0.52                 | Job category       | <0.001               |
| How long lived in house, months                                        | 0.27                 | Job category       | <0.001               |
| Firemen home                                                           | 0.44                 | Job category       | <0.001               |
| Where live during summer monsoon months when brick kilns are shut down | 0.57                 | Job category       | <0.001               |
| How many people live in house                                          | 0.25                 | Job category       | <0.001               |
| How many adults live in house                                          | 0.20                 | Job category       | <0.001               |
| How many children under 18 years of age live in house                  | 0.43                 | Job category       | <0.001               |
| How many children under six years of age live in house                 | 0.23                 | Job category       | <0.001               |
| Occupant density, residents/100 m <sup>2</sup>                         | 0.58                 | Job category       | <0.001               |
| Heating source in the home                                             | 0.18                 | Job category       | <0.001               |
| How often is the heating source in the home used                       | 0.38                 | Job category       | <0.001               |
| Any smokers living in the home                                         | 0.88                 | Job category       | <0.001               |
| How many smokers living in the home                                    | 0.72                 | Job category       | <0.001               |
| How many smokers living in the home regularly smoke inside the home    | 0.58                 | Job category       | <0.001               |

<sup>a</sup> Two samples were missing because one of the 50 workers enrolled in the study declined to participate in the personal breathing zone air sampling and a MicroPEM malfunctioned for another worker, so we could not obtain personal breathing zone information for that worker.

<sup>b</sup> Estimated using multivariable linear regression models of the original values adjusted for job category and the housing characteristic.

(a)

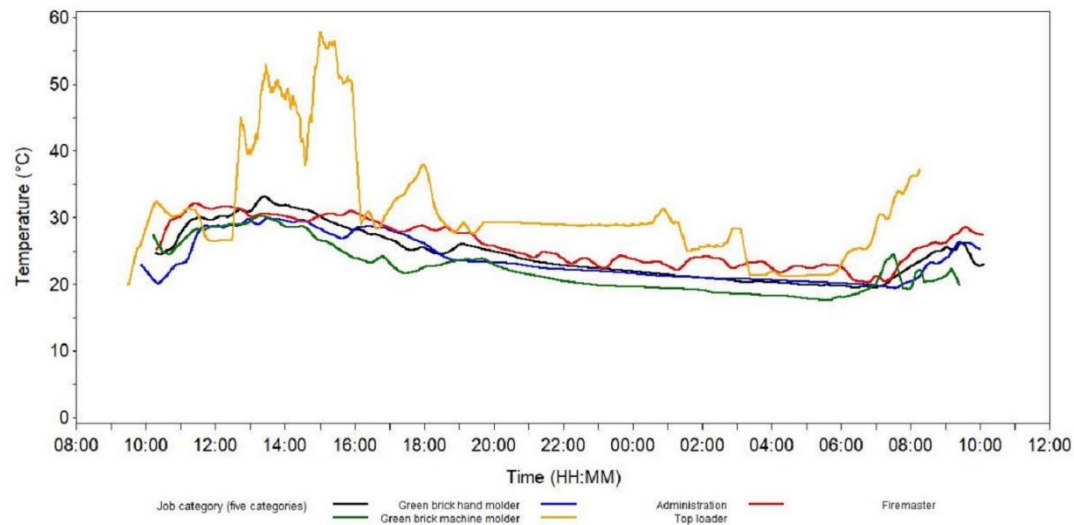

(b)

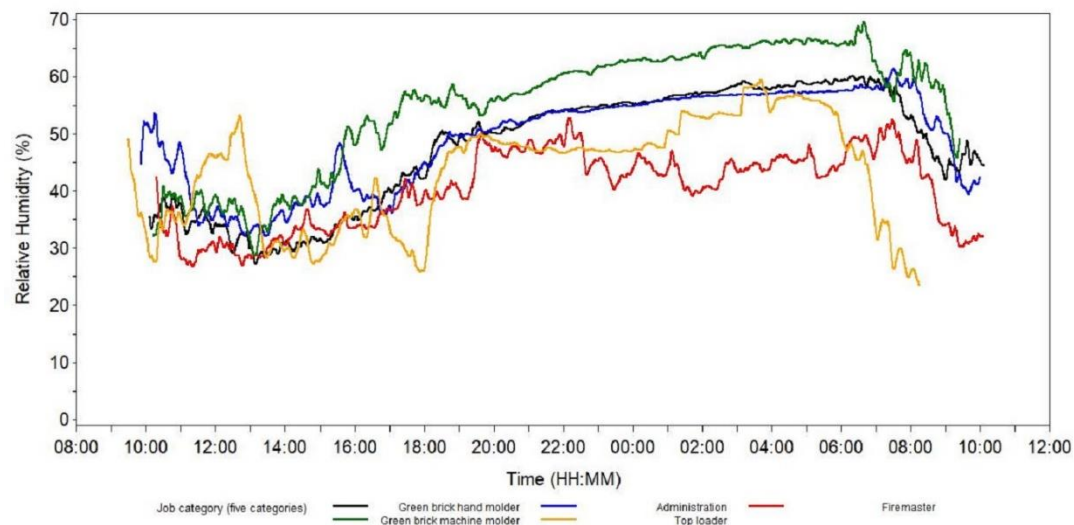

**Figure S1.** Line graphs of temporal trends in five-minute moving averages of arithmetic mean personal breathing zone temperature and relative humidity among workers<sup>a</sup> at a brick kiln in Bhaktapur, Nepal, March 2023: (a) temperature, (b) relative humidity. In each plot, results for each job category are shown with the following colors: Administration: blue, Firemen: red, Green brick hand molder: black, Green brick machine molder: green, Top loader: orange. <sup>a</sup> Two samples were missing because one of the 50 workers enrolled in the study declined to participate in the personal breathing zone air sampling and a MicroPEM malfunctioned for another worker, so we could not obtain personal breathing zone information for that worker.
